1 **Genetic polymorphism and evidence of signatures of selection in the**  
2 ***Plasmodium falciparum* circumsporozoite protein gene in Tanzanian regions with**  
3 **different malaria endemicity**

4

5

6 Beatus M. Lyimo<sup>1,2\*</sup>, Catherine Bakari<sup>1</sup>, Zachary R. Popkin-Hall<sup>3</sup>, David J. Giesbrecht<sup>4</sup>,  
7 Misago D. Seth<sup>1</sup>, Dativa Pereus<sup>1,5</sup>, Ramadhan Moshi<sup>1</sup>, Ruth Boniface<sup>1,5</sup>, Celine I.  
8 Mandara<sup>1</sup>, Rashid Madebe<sup>1</sup>, Jonathan J. Juliano<sup>3</sup>, Jeffrey A. Bailey<sup>4</sup> and Deus S.  
9 Ishengoma<sup>1,6,7</sup>

10

11 <sup>1</sup>National Institute for Medical Research, Dar es Salaam, Tanzania.

12 <sup>2</sup>Nelson Mandela African Institution of Science and Technology, Arusha, Tanzania

13 <sup>3</sup>University of North Carolina, Chapel Hill, NC, USA

14 <sup>4</sup>Brown University, Providence, RI, USA

15 <sup>5</sup>Muhimbili University of Health and Allied Sciences, Dar es Salaam, Tanzania.

16 <sup>6</sup>Harvard T.H Chan School of Public Health, Boston, MA, USA

17 <sup>7</sup>Faculty of Pharmaceutical Sciences, Monash University, Melbourne, Australia

18

19

20 **\*Corresponding author:** [beatus.lyimo@nm-aist.ac.tz](mailto:beatus.lyimo@nm-aist.ac.tz)

21

22

23

24

25

26

27

28

29

30

31

## 32 **Abstract**

33 **Background:** In 2021 and 2023, the World Health Organization approved RTS,S/AS01  
34 and R21/Matrix M malaria vaccines, respectively, for routine immunization of children in  
35 African countries with moderate to high transmission. These vaccines are made of  
36 *Plasmodium falciparum* circumsporozoite protein (*Pfcs*) but polymorphisms in this  
37 gene raises concerns regarding strain-specific responses and the long-term efficacy of  
38 these vaccines. This study assessed the *Pfcs* genetic diversity, population structure  
39 and signatures of selection among parasites from areas of different malaria  
40 transmission in mainland Tanzania, to generate baseline data before the introduction of  
41 the malaria vaccines in the country.

42 **Methods:** The analysis involved 589 whole genome sequences generated by and as  
43 part of the MalariaGEN Community Project. The samples were collected between 2013  
44 and January 2015 from five regions of mainland Tanzania: Morogoro and Tanga  
45 (Muheza) (moderate transmission areas), and Kagera (Muleba), Lindi (Nachingwea),  
46 and Kigoma (Ujiji) (high transmission areas). Wright's inbreeding coefficient ( $F_{ws}$ ),  
47 Wright's fixation index ( $F_{ST}$ ), principal component analysis, nucleotide diversity, and  
48 Tajima's D were used to assess within-host parasite diversity, population structure and  
49 natural selection.

50 **Results:** Based on  $F_{ws}$  ( $< 0.95$ ), there was high polyclonality (ranged from 69.23% in  
51 Nachingwea to 56.9% in Muheza). No population structure was detected in the *Pfcs*  
52 gene in the five regions (mean  $F_{ST}$  = 0.0068). The average nucleotide diversity ( $\pi$ ),  
53 nucleotide differentiation ( $K$ ) and haplotype diversity ( $Hd$ ) in the five regions were 4.19,  
54 0.973 and 0.0035, respectively. The C-terminal region of *Pfcs* showed high nucleotide

55 diversity at Th2R and Th3R regions. Positive values for the Tajima's D were observed in  
56 the Th2R and Th3R regions consistent with balancing selection. The *Pfcsp* C-terminal  
57 sequences had 50 different haplotypes (H\_1 to H\_50) and only 2% of sequences  
58 matched the 3D7 strain haplotype (H\_50).

59 **Conclusions:** The findings demonstrate high diversity of the *Pfcsp* gene with limited  
60 population differentiation. The *Pfcsp* gene showed positive Tajima's D values for  
61 parasite populations, consistent with balancing selection for variants within Th2R and  
62 Th3R regions. This data is consistent with other studies conducted across Africa and  
63 worldwide, which demonstrate low 3D7 haplotypes and little population structure.  
64 Therefore, additional research is warranted, incorporating other regions and more  
65 recent data to comprehensively assess trends in genetic diversity within this important  
66 gene. Such insights will inform the choice of alleles to be included in the future vaccines

67 **Keywords:** *Plasmodium falciparum*, Circumsporozoite protein, malaria vaccine, genetic  
68 diversity, signature of selection, Tanzania

69

70

71

72

73

74

75

76

77

## 78 **Background**

79 Malaria remains a major public health problem worldwide, with nearly half of the world's  
80 population at risk and lives in areas where malaria transmission occurs, but with the  
81 majority of cases and deaths from Sub-Saharan (SSA) (1). In 2022, over 95% (233  
82 million) of malaria cases and 96% of all deaths were reported from 29 countries in the  
83 World Health Organization (WHO) region of Africa (WHO – AFRO). The majority of the  
84 deaths occurred in Nigeria (31%), the Democratic Republic of the Congo (12%), Niger  
85 (6%) and the United Republic of Tanzania (4%) (2). In Tanzania, malaria is still a  
86 leading cause of morbidity and mortality mainly among children and pregnant women,  
87 and about 93% of the population lives in malaria-transmission areas (3). However, in  
88 recent years, the pattern of malaria in Tanzania has become heterogeneous, with a  
89 consistently higher burden in north-western, western and southern regions where high  
90 prevalence in school children (reaching 82%) has been reported, while other regions  
91 have consistently low to very low prevalence over the past 20 years (3).

92  
93 The WHO Global Technical Strategy for Malaria 2016-2030 aims to reduce 90% of both  
94 malaria incidences and mortality rates by 90% of the 2015 levels by 2030 and proceed  
95 to the elimination targets (4). Malaria eradication which is projected by 2050 (5), will  
96 greatly depend on the use of new and innovative tools as well as enhanced use of  
97 current interventions including surveillance, monitoring and evaluation (SME), vector  
98 control, and case management [through parasitological testing with rapid diagnostic  
99 tests (RDTs) and treatment with effective antimalarials (artemisinin combination  
100 therapy- ACT)] (4). However, malaria control strategies face many challenges including

101 emerging drug and insecticide resistance and histidine-rich protein 2/3 (*Pfhrp2/3*) gene  
102 deletions, limited diagnostic capacity, socio-cultural hindrance and a lack of effective  
103 vaccines (4,6,7). Urgent measures are required to get malaria elimination efforts on  
104 track and progressing to the GTS targets by 2030.

105  
106 Malaria parasites have a complex life cycle in both human and mosquito hosts,  
107 including an asymptomatic stage (pre-erythrocytic), followed by a symptomatic blood  
108 stage (erythrocytic) in humans and a sexual stage in the mosquito host. The parasite  
109 also exhibits stages characterized by extensive genetic and antigenic diversity and  
110 these factors which are associated with the biology of parasites and vectors may  
111 present obstacles to anti-malarial control measures (8,9). As with other pathogens,  
112 vaccines are among the most successful and cost-effective interventions in the history  
113 of public health (10). For effective malaria control and elimination strategies, it is  
114 important to develop a malaria vaccine that provides durable protection against clinical  
115 malaria and prevents infection. Efforts to develop a malaria vaccine have been ongoing  
116 since the 1980s and focused on vaccines targeting specific stages of the parasite life  
117 cycle such as pre-erythrocytic, erythrocytic and sexual stage vaccine candidates (11–  
118 13). Antigens expressed in the pre-erythrocytic (sporozoites and liver) stages represent  
119 the ideal vaccine candidate to block the progression to clinical malaria through vaccine-  
120 based interventions (14,15).

121  
122 The RTS,S/A01 is a pre-erythrocytic vaccine based on circumsporozoite protein (*Pf*csp  
123 of the 3D7 laboratory strain of *P. falciparum*) (9). It is the first malaria vaccine to be

124 endorsed by the WHO for routine immunization of children in moderate to high  
125 transmission areas (16). The vaccine is made of a fragment of CSP antigen fused with  
126 Hepatitis B surface antigen and AS01 adjuvant (17). It targets specific immunogenic  
127 epitopes expressed on the surface of the *Pf*csp gene and offers better protection  
128 against malaria infections (17,18). Clinical trials of the RTS,S vaccine which were  
129 conducted in African countries including phase III trials involving children aged 5-17  
130 months and 6-12 weeks from Mozambique, Gabon, Gambia, Ghana, Kenya and  
131 Tanzania showed significant protection against natural falciparum infections (19–23).  
132 The overall efficacy of the vaccine administered at 0-, 1-, 2-month followed by a fourth  
133 dose administered at 18 months was 36.3% (95% CI: 31.8–40.5) after an average of 48  
134 months of follow-up (19–23).

135  
136 The R21/Matrix-M vaccine is a next-generation pre-erythrocytic vaccine based on CSP,  
137 similar to the RTS,S/AS01 vaccine (24). The vaccine was created by combining the C-  
138 terminal segment of CSP from the *P. falciparum* strain NF54 (24,25). The utilized CSP  
139 portion encompasses 19 NANP repeats sourced from the central repeat region,  
140 recognized as a protective B cell epitope, along with the C-terminal region housing  
141 essential T cell epitopes. It is the second malaria vaccine endorsed by the WHO,  
142 succeeding the RTS,S/AS01 vaccine, and is recommended for use in children residing  
143 in regions with low to moderate malaria prevalence (2). This vaccine has successfully  
144 completed phase III clinical trials, involving children aged 5-36 months, at five sites in  
145 four countries across West Africa (Burkina Faso and Mali) and East Africa (Kenya and  
146 Tanzania), each with varying malaria transmission patterns. Results from this study

147 have demonstrated a high efficacy of more than 75% against clinical malaria in African  
148 children, addressing both seasonal and perennial transmission settings (26,27).  
149 However, a study from elsewhere has indicated that the CSP-based vaccine  
150 demonstrates improved efficacy against clinical malaria when infections match the 3D7  
151 vaccine construct at epitope haplotypes and amino acid positions. This implies that the  
152 vaccine's efficacy may partially depend on the prevalence of the C-allele in a given  
153 geographical location (28,29).

154 PfCSP is predominantly a surface protein of sporozoite and plays a critical role in the  
155 invasion of hepatocytes (liver cells) (30,31). The gene encoding this protein is located  
156 on chromosome 3 of *P. falciparum* within regions that encode epitopes recognized by  
157 the human immune system. The C-terminal repeat region of the *Pfmsp* gene, which  
158 codes for epitopes recognized by anti-CSP antibodies, contains tetrameric repeats that  
159 vary in both sequence and number of tetramers (32–34). For cell-mediated immunity,  
160 the RTS,S/AS01 vaccine includes a fragment of the central NANP-NVDP repeats  
161 polymorphic B-cell epitope region and a highly polymorphic C-terminal non-repeat  
162 epitope region of *Pfmsp*, which covers CD4+ and CD8+ T-cell epitopes denoted as  
163 TH2R and TH3R, respectively (9,35). Previous studies revealed high polymorphisms in  
164 these regions within the C-terminal of the *Pfmsp* gene in natural parasite populations,  
165 which might have resulted from natural selection by the host immune system (36,37).

166 Reports from previous studies of the population structure of *P. falciparum* genes coding  
167 for vaccine antigens, including the *Pfmsp* showed variable levels of diversity and  
168 geographic restriction of specific subgroups which may have an impact on the efficacy  
169 of malaria vaccines based on this gene in specific geographic regions (36). In particular,

170 comparative diversity studies of the 3D7 *Pf*csp gene showed that only 0.2% to 5.0% of  
171 the vaccine strains matched the global *Pf*csp gene (38). A larger number of these  
172 studies described polymorphisms in the *Pf*csp gene at the global level, with limited  
173 local-specific studies.

174 Therefore, there is an urgent need to explore the extent of genetic diversity and natural  
175 selection of the malaria vaccine antigen PfCSP in natural parasite populations in  
176 Tanzania and other countries where the RTS,S/AS01 and R21/Matrix-M vaccines will  
177 be deployed in the near future. This study investigated the genetic diversity and  
178 population structure of the *Pf*csp gene within five regions of Tanzania with varying  
179 malaria transmission intensities. In addition, the study aimed to determine whether  
180 genetic diversity and signatures of selection in this important gene are present. The  
181 findings present baseline data before the Ministry of Health rolls out any of the malaria  
182 vaccines in an effort to eliminate malaria in Tanzania.

## 183 **Materials and methods**

### 184 **Study area**

185 Field studies that generated samples and data for this study were conducted between  
186 May 2013 and January 2015 as part of the Pathogen Diversity Network Africa (PDNA)  
187 baseline surveys in 15 countries from Sub-Saharan Africa (SSA) (39–41). In Tanzania,  
188 the studies covered five districts from five regions with varying malaria transmission that  
189 are located more than 800 km apart. The study districts included Muheza in the Tanga  
190 region and Morogoro (moderate to low transmission area), Ujiji in Kigoma, Muleba in  
191 Kagera and Nachingwea in Lindi (all with high transmission), as described elsewhere  
192 (39) (**Figure 1**).



## 193 **Study design and sampling**

194 The samples were collected through a cross-sectional study (CSS), which was  
195 conducted in five districts of Morogoro, Muheza, Muleba, Nachingwea and Ujiji in 2013  
196 while other samples were collected from two therapeutic efficacy studies (TES) which  
197 were conducted at Mkuzi Health Centre in 2013, and in Muheza designated district  
198 hospital and Ujiji health centre from May 2014 to January 2015 as described elsewhere  
199 (39). The TES were conducted according to the WHO protocol as previously described  
200 (42,43).

## 201 **Sample collection, processing, DNA extraction and Sequencing**

202 Whole blood samples were collected from patients with malaria infections who were  
203 initially screened with rapid diagnostic tests for malaria (mRDTs) and the infections  
204 were confirmed using microscopy as described earlier (39). Human white blood cells  
205 (WBCs) were depleted from whole blood samples using CF11 cellulose columns (44),  
206 and parasite genomic DNA was extracted using QIAamp DNA blood midi kits (Qiagen  
207 GmbH, Hilden, Germany) following the manufacturer's instructions. DNA samples were  
208 shipped to the Wellcome Trust Sanger Institute in Hinxton, UK, for whole genome  
209 sequencing (WGS) using the Illumina HiSeq platform as part of the MalariaGEN  
210 *Plasmodium falciparum* Community Project (45). Illumina sequencing libraries (200 bp  
211 insert) were aligned to the reference *P. falciparum* 3D7 genome, after which variant  
212 calling was conducted via the customized GATK pipeline (45). Each sample was  
213 genotyped for 797,000 polymorphic biallelic coding single nucleotide polymorphisms  
214 (SNPs) across the genome, ensuring a minimum of 5x paired-end reads coverage

215 across each variant per sample. The dominant allele was retained in the genotype file at  
216 loci with mixed reads (reference/non-reference).

217

## 218 **Sequence acquisition and pre-processing**

219 WGS data of 589 *P. falciparum* samples collected from the five districts of Morogoro (n  
220 = 32), Muheza (n = 297), Muleba (n = 52), Nachingwea (n = 65) and Ujiji (n = 143) were  
221 downloaded from the MalariaGEN *Plasmodium falciparum* Community (Pf7k) project in  
222 variant call format (VCF) at <https://www.malariagen.net/resource/34>. The VCF file was  
223 generated following standardized protocols (46). In brief, reads mapping to the human  
224 reference genome were discarded before all analyses, and the remaining reads were  
225 mapped to the *P. falciparum* 3D7 v3 reference genome using Burrows-Wheeler aligner  
226 (bwa) mem version 0.7.15 (47). Binary Alignment Map (BAM) files were created using  
227 the Picard tools (48) CleanSam, FixMateInformation and MarkDuplicates version 2.6.0  
228 and GATK v3 (49) base quality score recalibration. Potential SNPs and indels were  
229 discovered by running GATK's HaplotypeCaller independently across each sample  
230 BAM file and genotyping these for each of the 16 reference sequences (14  
231 chromosomes, 1 apicoplast and 1 mitochondria) using GATK's CombineGVCFs and  
232 GenotypeGVCFs. SNPs and indels were filtered using GATK's Variant Quality Score  
233 Recalibration (VQSR). All variants with a variant quality score log-odds (VQSLOD)  
234 score  $\leq 0$  were filtered out and functional annotations were applied using snpEff version  
235 4.1. Genome annotation was performed using vcftools version 0.1.10 and masked if  
236 they were outside the core genome. Only biallelic SNPs from chromosome 3 that

237 passed all VCF filters were retained. Then SNP variants for the entire *Pfcsp* were  
238 extracted from chromosome 3 (position: 221,323–222,516) for further analysis.

### 239 **Population genetics analysis**

240 The analysis included determining the minor allele frequency (MAF) distribution for all  
241 putative SNPs within *Pfcsp* using Plink1.9, and rare alleles (MAF  $\leq$  0.01) were removed  
242 from the analysis. Wright's inbreeding coefficient ( $F_{ws}$ ) (50) was determined using R  
243 package moimix (51).  $F_{ws}$  refers to the number of different parasite strains contained  
244 within an infection, and it ranges from 0 to 1. A sample is classified as having multiple  
245 infections (polyclonal) when  $F_{ws} < 0.95$  and a single infection (monoclonal) when  $F_{ws} \geq$   
246 0.95. A Pearson chi-square test was used to determine the statistical significance of any  
247 differences observed in  $F_{ws}$  estimates between the populations, and a standard  
248 threshold of  $p < 0.05$  was considered statistically significant.

249 To assess gene flow between parasite populations, genetic differentiation was first  
250 estimated using the Wright Fixation index ( $F_{ST}$ ) (52) using Vcftools v0.1.5 and  
251 population structure was determined using principal component analysis (PCA) as  
252 implemented in PLINK1.9.  $F_{ST} < 0.05$  indicates minimal population differentiation or gene  
253 flow between population pairs. Haplotype diversity (the number of two randomly  
254 selected strains within the population having different haplotypes) in *Pfcsp* was  
255 determined by studying the variants in the C-terminal region of the gene (221422-  
256 221583 on chromosome 3). A total of 229 FASTA DNA sequences were reconstructed

257 from the retained monoclonal VCF samples and the *Pf*csp sequence of the 3D7 strain  
258 was included as a reference. The monoclonal VCF samples were obtained based on  
259 the  $F_{ws}$  results, where samples with  $F_{ws} \geq 0.95$  were considered a single infection  
260 (monoclonal). The average number of pairwise nucleotide diversity (K), haplotype  
261 diversity (Hd) and nucleotide diversity were calculated using DnaSP version 6.12.03  
262 (53). To assess the genetic relationships between *Pf*csp C-terminal haplotypes in the  
263 five districts, the haplotype networking for 229 sequences of *Pf*csp was analyzed using  
264 NETWORK version 10.2 with the Median-joining algorithm (54).  
265 Nucleotide diversity ( $\pi$ ) was used to measure the degree of polymorphism within the  
266 parasite population, and it was analyzed by calculating the pairwise difference between  
267 all possible pairs of individuals in the samples using Vcftools v0.1.5 (55) in the sliding  
268 windows, with a size of 1000 bp. The Tajima's D statistical test (56) was used to detect  
269 evidence of balancing selection or purifying selection in the *Pf*csp. Tajima's D was  
270 calculated in *Pf*csp monoclonal samples using Vcftools v0.1.5 in 1000 bp sliding  
271 windows. Tajima's D test compares the average pairwise differences ( $\pi$ ) and the total  
272 number of segregating sites (S) (57) and it was assessed using MEGA software version  
273 11.0.13 (58) and DnaSP version 6.12.03 (53).

## 274 **Results**

### 275 **Within-host parasite diversity estimation and statistical analysis**

276 Within-host diversity in the *Pf*csp gene was assessed using the inbreeding coefficient  
277 ( $F_{ws}$ ) and the results indicated high within-host diversity (polyclonality), varying from

278 69.23% in Nachingwea to 56.9% in Muheza. Nevertheless, the observed difference did  
279 not reach statistical significance ( $p= 0.3596$ )(**Figure 2**)

### 280 **Genetic differentiation and structure analysis**

281 Genetic differentiation in the Pfcsp population was analyzed by calculating Wright's  
282 fixation index ( $F_{ST}$ ). The mean  $F_{ST}$  across five districts—Morogoro, Muheza, Muleba,  
283 Nachingwea and Ujiji was very low at 0.0068 (which is  $< 0.05$ ) (**Figure 3a**). This  
284 indicates low genetic differentiation among the parasite populations or a high exchange  
285 of genetic materials despite the districts being geographically separated with a distance  
286 of over 800 km. Principal component analysis (**Figure 3b**) showed no population  
287 structure between the five districts. The overall results suggest gene flow between the  
288 populations.

### 289 **Genetic diversity of Pfcsp C-terminal within parasite populations**

290 To assess the extent of genetic diversity and similarity within and between the five  
291 populations, an investigation into the diversity in the C-terminal region of Pfcsp  
292 (221,422-221,583) was done and summarized in a median-join haplotype diversity  
293 network (**Figure 4**). In total, 50 haplotypes were observed among the 230 Pfcsp  
294 sequences, including the 3D7 sequence. Of these, more haplotypes were identified in  
295 Ujiji (24) and Muheza (27) while the other districts had fewer haplotypes between 8 and  
296 14 (Morogoro = 8, Muleba, 14, Nachingwea = 14). The RTS,S vaccine haplotype  
297 (Pf3D7-type) was found in 2% (H\_50) of all samples. Four haplotypes (8%) were shared  
298 by Pfcsp sequences from all five regions, indicating genetic closeness between these  
299 populations. Haplotype 5 emerged as the most prevalent Pfcsp C-terminal haplotype,

300 representing 16.5% (38/230) of the isolates. Among the haplotypes, 50% appeared only  
301 once (singleton haplotypes).

### 302 **Nucleotide diversity and signatures of selection in the C-terminal non-repeat** 303 **region of the *PfCsp* gene**

304 The average number of pairwise nucleotide differences ( $K$ ) was higher in Muleba (4.1)  
305 and Ujiji (4.0) compared to other districts with 3.3 - 3.4 (in Morogoro = 3.4, Muheza =  
306 3.4, and Nachingwea = 3.3). The highest haplotype diversity ( $H_d$ ) was observed in  
307 Muleba ( $0.976 \pm 0.008$ ) and Ujiji ( $0.973 \pm 0.005$ ) and the lowest was observed in  
308 Morogoro ( $0.917 \pm 0.035$ ). The highest nucleotide diversity ( $\pi$ ) was observed in Muleba  
309 (0.0038) and Muheza (0.0037) and the lowest was observed in Morogoro (0.0029) but  
310 the differences were not significant ( $p > 0.05$ ). Evidence of natural selection in the C-  
311 terminal non-repeat region of the *PfCsp* gene was tested using Tajima's D and there  
312 were slightly positive values of 1.3, 1.3, 0.76 and 0.16 in Muheza, Muleba, Nachingwea  
313 and Ujiji, respectively; while Morogoro showed negative value of - 0.21. However, these  
314 values suggest evidence of weak balancing in the population (**Table 1**).

315 The nucleotide diversity peaked at the Th2R and Th3R T-cell epitopes, while the  
316 connecting region between Th2R and Th3R was conserved. Nucleotide diversity  
317 showed slightly different values between populations according to their geographic  
318 origin (**Figure 5**), with Muleba showing a higher peak  $> 0.07$  in Th2R epitopes than the  
319 other four districts. The extended haplotype homozygosity revealed some extended  
320 haplotypes from the focal SNP locus 221,554 in all populations, but no long range haplotypes  
321 extended beyond 221,554 (**Figure 6**)

322

### 323 **Discussion**

324 Tanzania is one of the malaria-endemic countries with a high number of cases and  
325 deaths in SSA and malaria is still a major health problem despite intensified  
326 interventions in the past two decades (2). Recent studies show that malaria  
327 transmission in Tanzania has become heterogeneous with persistently high burden in  
328 the western, north-west and southern regions for over 20 years (59) but lower  
329 transmission intensities in other regions attributed to the ongoing control efforts. The  
330 Tanzanian NMCP is implementing targeted interventions to reduce the burden in areas  
331 with high transmission and eliminate malaria in regions that have consistently reported  
332 low transmission over the past 20 years (60). Among the interventions, NMCP is  
333 considering the deployment and use of malaria vaccines following their approval by  
334 WHO in 2021 and 2023 (2,61). This study was therefore undertaken to generate  
335 baseline data on the genetic diversity, population structure and signature of selection in  
336 the *Pfcs* gene before the roll-out of malaria vaccines in Tanzania. The data will  
337 potentially be useful in monitoring the performance of the vaccines after their  
338 introduction and use in Tanzania to look for shifts in variations – or new variations– that  
339 may arise due to vaccine pressure.

340 In general, the study showed no clear differentiation in the patterns of the *Pfcs* gene  
341 polymorphism despite the study sites being widely separated geographically (with over  
342 800 km apart), which is consistent with global patterns of *Pfcs* variations which have  
343 been reported elsewhere (62,63). The lack of clear differentiation was according to the  
344 pairwise index of differentiation analysis ( $F_{ST}$  below 0.05) and confirmed by PCA.  
345 Similar findings were reported in Ghana where *pfcs* sequences collected from two  
346 sites located over 784.4 km apart showed a largely homogeneous population with  $F_{ST}$

347 below 0.05, and without any population structure as detected by PCA (62). This and  
348 other studies of the *Pfcs* gene suggested a continued gene flow among parasites or  
349 human population mixing between the areas which might have contributed to the  
350 observed findings (62,64,65). High genetic diversity and a lack of population  
351 differentiation may have important implications related to the efficacy and emergence as  
352 well spread of vaccine-resistant parasites (66,67).

353 The C-terminal of the *Pfcs* gene displayed high genetic diversity in the study areas. A  
354 comparative sliding window plot analysis of nucleotide diversity in the C-terminal region  
355 displayed predictable results of two peaks at the Th2R and Th3R regions, suggesting  
356 that genetic variations were mainly concentrated in these regions. Differences were also  
357 observed among parasites from different geographical locations. The overall nucleotide  
358 diversity was 0.0035 with Muleba showing a high peak in Th2R epitopes. A similar  
359 pattern of nucleotide polymorphism was found in other African countries including  
360 Malawi, The Gambia, Nigeria, Ghana, Mali and Guinea (8,38,62).

361  
362 The overall haplotype diversity in the C-terminal of the *Pfcs* gene in Tanzanian isolates  
363 was 0.937 which is similar to those previously observed in Cameroon, The Gambia,  
364 Ghana, Senegal, Congo, Malawi and Guinea but higher than those observed in non-  
365 African countries (8,68). This suggests that the C-terminal of the *Pfcs* gene in Africa  
366 has a higher level of diversity compared to other parts of the world (37). The values of  
367 Tajima's D in the C-terminal region of the *Pfcs* exhibited slightly positive values which  
368 suggest evidence of weak balancing selection in response to host immune pressure on  
369 this region (8). Similar results have been reported showing weak variant-specific



370 selection within this region, as shown by a study in Malawi (69). Evidence of balancing  
371 selection has been reported in other malaria vaccine candidates such as the  
372 extracellular domains of *P. falciparum* apical membrane antigen (PfAMA-1), Cell-  
373 Traversal protein for Ookinetes and Sporozoites (CeTOS), Thrombospondin Related  
374 Adhesion Protein (TRAP), Liver Stage Antigen 1 (LSA1) and merozoite surface proteins  
375 (MSP1) (70–73). Evidence of recent directional selection (iHS) was not observed in all  
376 study areas and extended haplotype homozygosity showed no extended haplotypes  
377 from the focal SNP locus (221,554)(69,74).

378 The haplotype network analysis in the C-terminal showed a sequence connection  
379 between the five areas, which suggests they were closely related. This relatedness is in  
380 agreement with the  $F_{ST}$  and PCA results which showed limited separation in isolates  
381 from the five districts. The current RTS,S, recombinant vaccine was constructed with  
382 *pfmsp* of *P. falciparum* 3D7 strain, but in Tanzanian isolates, only 0.7% 3D7-matched  
383 Tanzanian *pfmsp* haplotypes. Low matching of the 3D7 to the natural *Pfmsp* has been  
384 reported in many other studies in Africa (8,38,64,68). This data is consistent with other  
385 studies conducted across Africa and worldwide, which demonstrate low 3D7 haplotypes  
386 and little population structure. However, other studies of the genetic diversity and  
387 protective efficacy of the RTS,S/AS01 vaccine suggested that high levels of mismatch  
388 between natural isolates and 3D7 may weaken vaccine efficacy (28,68). In addition, the  
389 high degree of location-specific *Pfmsp* diversity observed in Tanzania might result in  
390 differences in vaccine efficacy potentially reducing RTS,S/AS01 vaccine effectiveness.  
391 Monitoring of differential vaccine efficacy according to *Pfmsp* haplotypes during  
392 RTS,S/AS01 implementation programmes will be valuable, particularly in high

393 transmission areas, where a post-vaccination expansion of non-vaccine haplotypes is  
394 likely to be observed which could lead to reduced vaccine efficacy and vaccine  
395 breakthrough infections (64). Going forward and ensuring the vaccine is efficacious in  
396 all endemic areas, the design of a malaria vaccine may consider developing a vaccine  
397 that works for specific regions based on the genetic architecture of the parasites found  
398 in those areas.

### 399 **Conclusion**

400 These findings demonstrate a significant level of genetic diversity in the *Pfcs* gene  
401 within the study areas. Although there is limited population differentiation and structure,  
402 there is a high degree of polyclonality, particularly in Morogoro, Muleba and  
403 Nachingwea. Furthermore, there is no genetic structure across all the study districts,  
404 indicating a high level of gene flow and genetic exchange within the *Pfcs* gene. In  
405 addition, the C-terminal region of the *Pfcs* gene from Muleba and Muheza exhibited  
406 higher nucleotide diversity compared to Morogoro, Nachingwea and Ujiji. Additionally,  
407 the *Pfcs* gene displayed slight positive Tajima's D values in all five studied *P.*  
408 *falciparum* populations. These findings are consistent with the hypothesis of balancing  
409 selection acting on the Th2R and Th3R regions of the gene. However, it is important to  
410 note that further studies and continuous monitoring of the *Pfcs* gene are necessary.  
411 These future investigations should encompass other regions and incorporate more  
412 recent data to comprehensively assess the current diversity and dynamics of the *Pfcs*  
413 gene. By expanding the understanding of the genetic variations within the *Pfcs* gene, it  
414 creat an opportunity to improve the knowledge of the parasite's adaptability and  
415 contribute to the development of effective malaria control strategies

416

#### 417 **Availability of data and materials**

418 The datasets generated during the current study are available in the MalariaGEN

419 *Plasmodium falciparum* Community (Pf7k) Project

420 <https://www.malariagen.net/resource/34>.

421

#### 422 **Acknowledgement**

423 Authors would like to thank the study participants, local health workers and technicians

424 who participated in the sample collection. Whole genome sequencing was done at the

425 Wellcome Sanger Institute as part of the MalariaGen *Plasmodium falciparum*

426 Community Project.

427

#### 428 **Ethical approval**

429 The study utilized sequence data downloaded from the open-source, MalariaGEN

430 (<https://www.ncbi.nlm.nih.gov/pmc/articles/PMC2928508/>). The study protocols for the

431 projects that collected the samples were reviewed and approved by the Tanzanian

432 Medical Research Coordinating Committee (MRCC) of the National Institute for Medical

433 Research (NIMR). Permission to conduct the study in Morogoro, Muheza – Tanga,

434 Muleba – Kagera, Nachingwea - Lindi and Ujiji - Kigoma was sought in writing and

435 obtained from the district and regional medical officers. Written informed consent was

436 obtained from patients or parents/guardians in the case of children. Appropriate

437 information (about the study and the protocol/methods) in a language that was

438 understood by the parents/guardians of the study patients was compiled and provided

439 before consent was obtained. Permission to publish was sought and obtained from the

440 Director General of NIMR

#### 441 **Authors' contributions**

442 DSI - formulated the original idea, supervised data analysis and wrote the manuscript;

443 BL - performed the analysis and wrote the manuscript

444 CB, ZPH and DG - supported the data analysis, reviewed and edited the manuscript

445 RB, MS and CIM - conceived the idea, implemented the field surveys, reviewed and

446 edited the manuscript

447 DP and RM - reviewed and edited the manuscript

448 JJ, JB, and DSI - critically reviewed the manuscript

449 All authors contributed to the article and approved the submitted version.

450

#### 451 **Competing Financial Interests:**

452 The authors declare that they have no known competing financial interests or personal

453 relationships that could have influenced the work reported in this paper.

454

455

#### 456 **Funding**

457 This publication uses data from the MalariaGEN *Plasmodium falciparum* Community

458 Project as described in 'An open dataset of *Plasmodium falciparum* genome variation in

459 7,000 worldwide samples.

460 This study was part of BL's postdoctoral fellowship which was supported, in whole, by

461 the Bill & Melinda Gates Foundation [grant number 02202]. Under the grant conditions

462 of the Foundation, a Creative Commons Attribution 4.0 Generic License has already  
463 been assigned to the Author Accepted Manuscript version that might arise from this  
464 submission. JJ also received funding from NIH K24AI134990.

465  
466  
467  
468

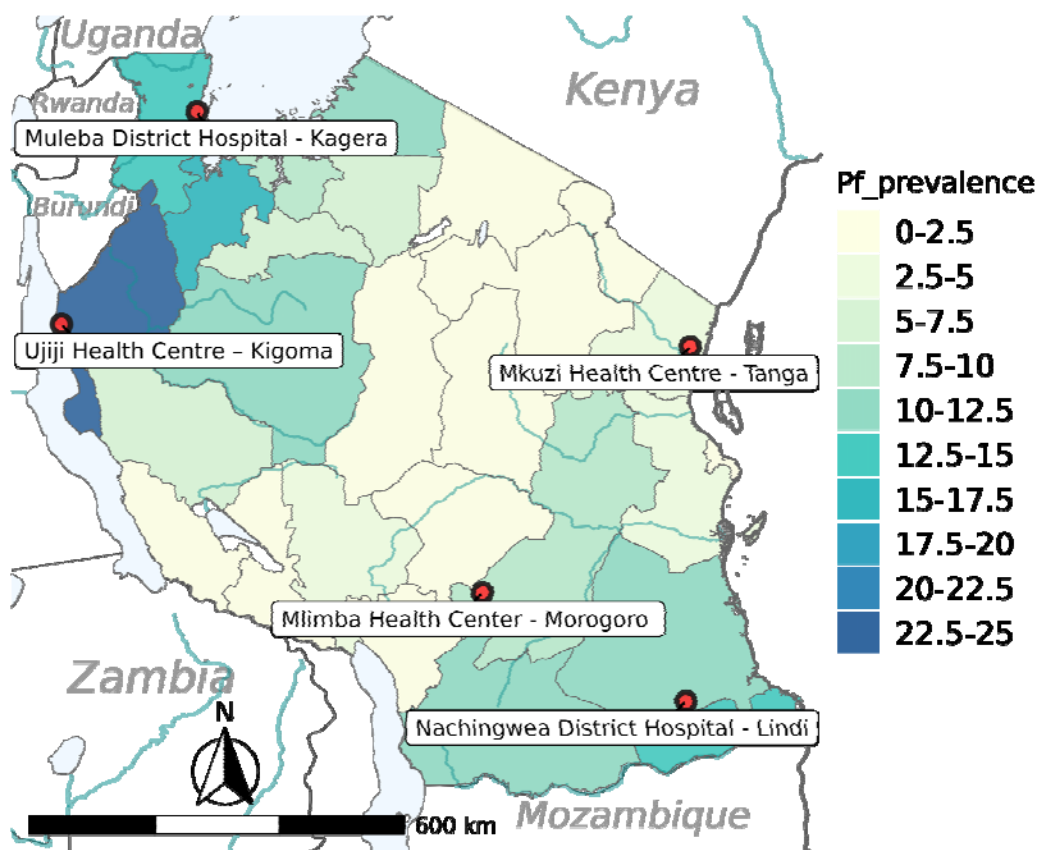

469  
470 **Figure 1:** Map of Tanzania showing *P. falciparum* prevalence as a color gradient, and  
471 the location of the study regions (75).

472  
473  
474  
475  
476

477  
478  
479  
480  
481  
482  
483  
484  
485

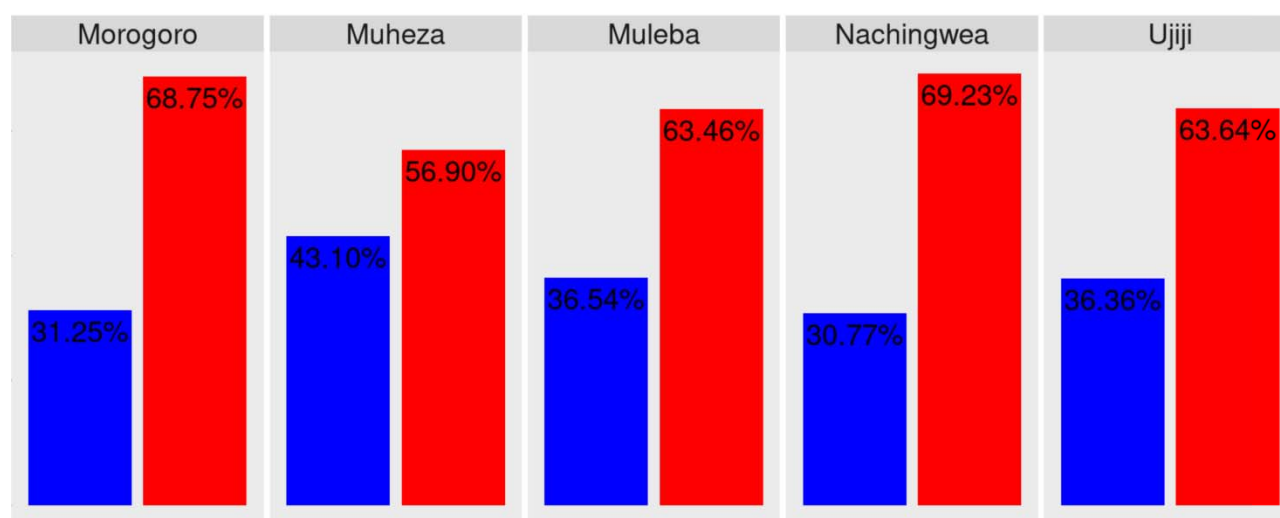

486  
487 **Figure 2: With in-host diversity in the samples from Morogoro, Muheza, Muleba,**  
488 **Nachingwea, and Ujiji populations. The differences were not statistically significant ( $p=$**   
489 **0.3596).**

490  
491  
492  
493  
494  
495  
496  
497  
498

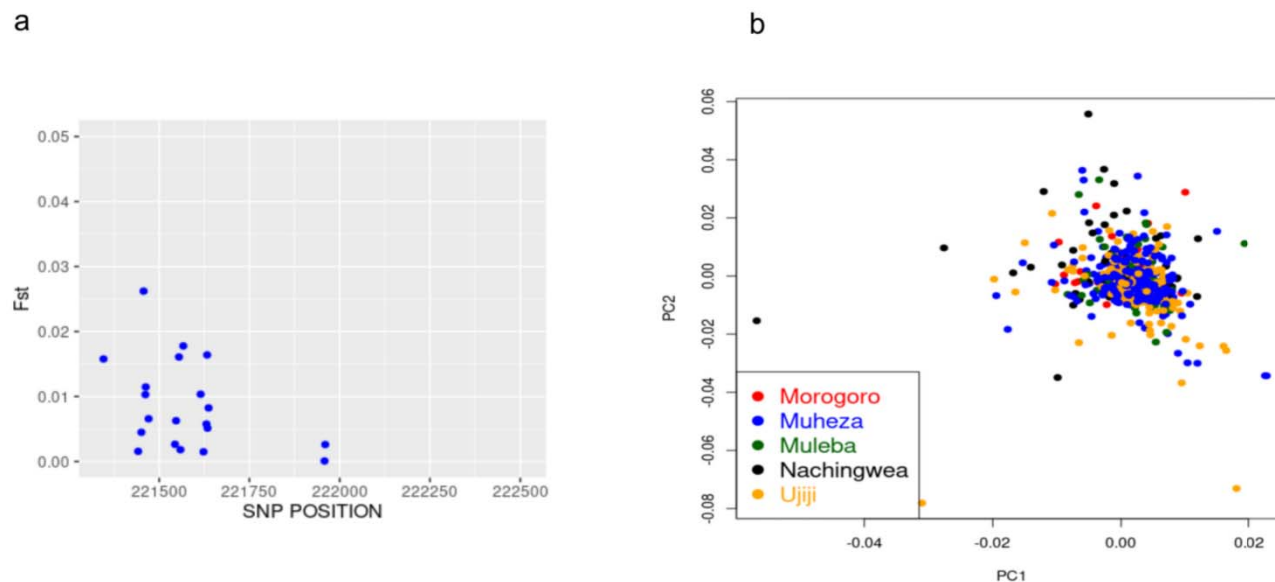

499  
500 **Figure 3:** Population differentiation and structure. **a.** Weir and Cockerham's  $F_{ST}$  among  
501 parasites from Morogoro, Muheza, Muleba, Nachingwea and Ujiji. **b.** The plot of the first  
502 (PC1) and second principal components (PC2) of samples from Morogoro, Muheza,  
503 Muleba, Nachingwea and Ujiji.

504  
505  
506  
507  
508  
509  
510  
511  
512  
513  
514  
515  
516  
517  
518

519 **Table 1: Diversity of the *Pf*csp C-terminal region of samples included in the**  
520 **network analysis**

521  
522

| Population | n   | H  | s  | k     | $\pi$   | Hd          | Tajima's D |
|------------|-----|----|----|-------|---------|-------------|------------|
| Morogoro   | 10  | 8  | 15 | 3.4   | 0.0198  | 0.978±0.035 | -0.235     |
| Muheza     | 128 | 27 | 18 | 4.3   | 0.0027  | 0.925±0.005 | 0.12       |
| Muleba     | 19  | 14 | 15 | 4.008 | 0.0037  | 0.970±0.016 | 0.44       |
| Nachingwea | 20  | 14 | 11 | 3.920 | 0.00033 | 0.953±0.008 | 0.41       |
| Ujiji      | 52  | 24 | 17 | 4.008 | 0.0027  | 0.947±0.005 | 0.16       |

523  
524 *n* number of sequences, *h* number of unique haplotypes, *s* number of segregating sites,  
525 *k* average of pairwise nucleotides differences,  $\pi$  nucleotide diversity, *Hd* haplotype  
526 diversity  
527  
528



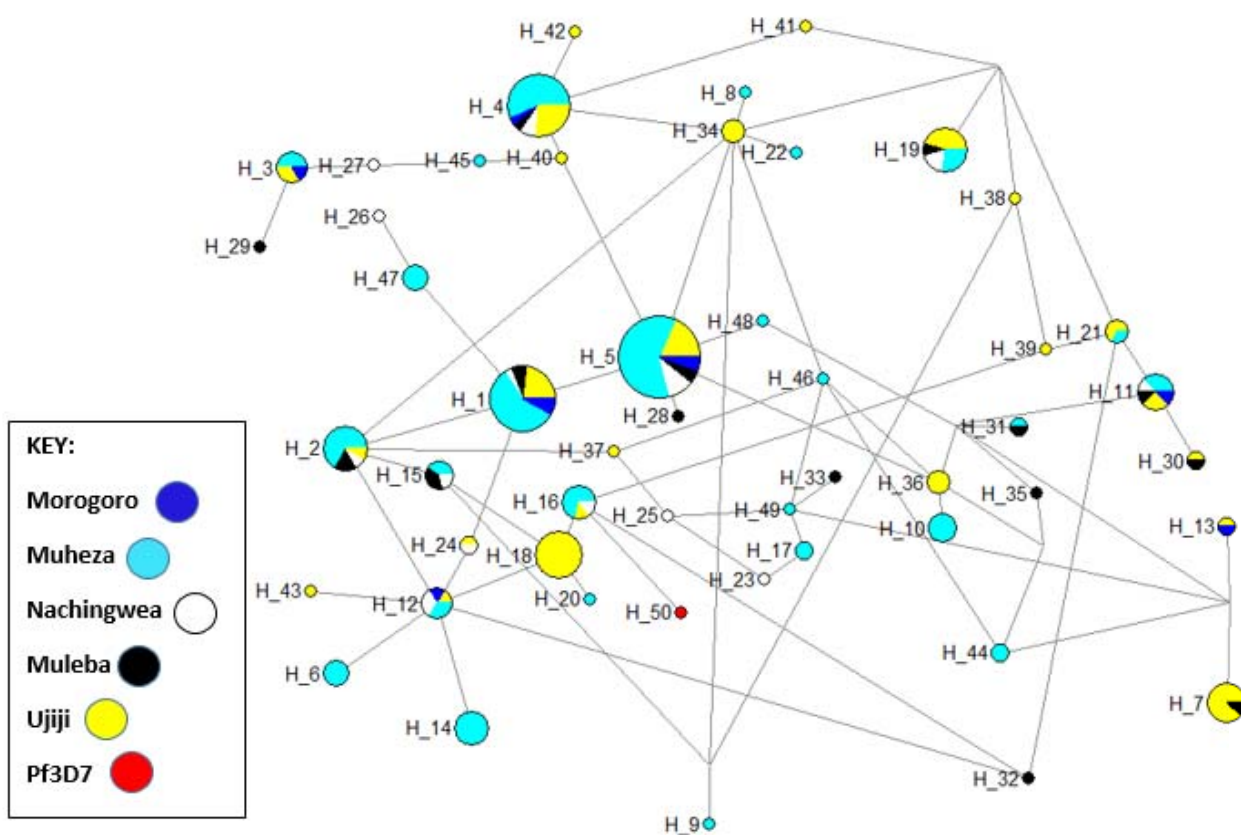

529  
530 **Figure 4:** Haplotype network analysis of the *Pfcsp* gene among parasites from  
531 Morogoro, Muheza, Muleba, Nachingwea and Ujiji. The size of each node indicated the  
532 proportion of the total haplotype frequencies. Each haplotype is denoted as “H” with the  
533 vaccine strain 3D7 denoted as “3D7” in Hap\_50. The color of each node corresponds to  
534 the site of sample origin.

535  
536  
537  
538

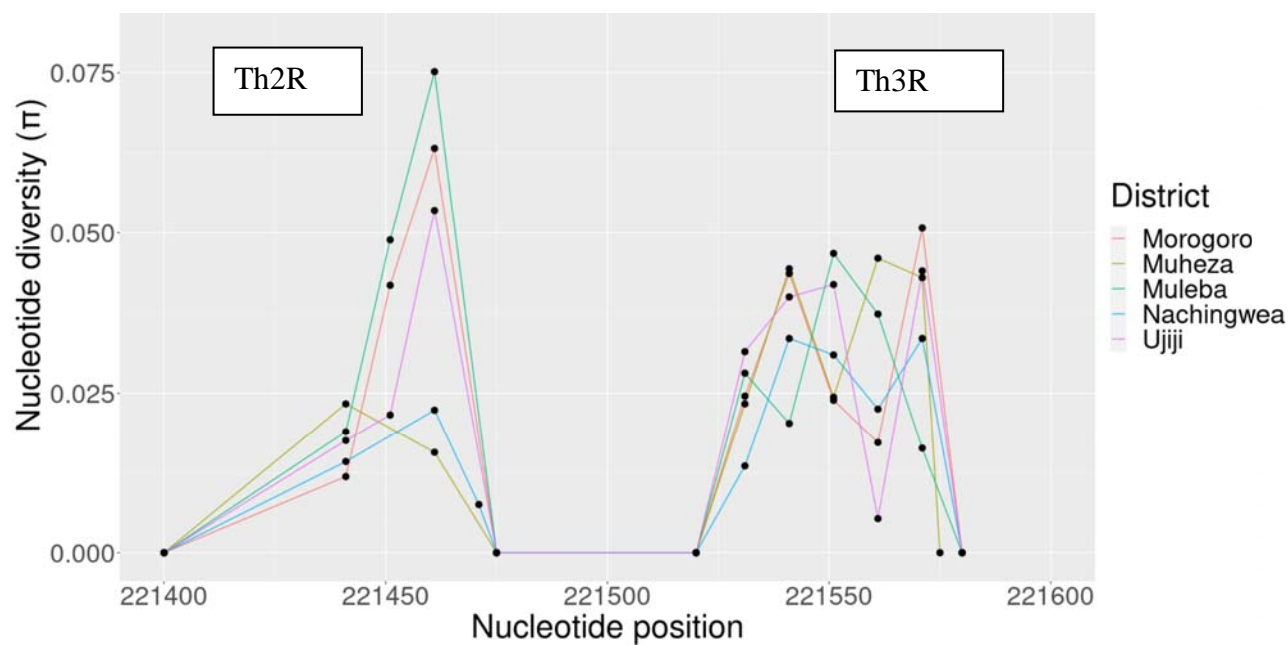

539  
540 **Figure 5:** Nucleotide diversity of the C-terminal region of the *Pfcsp* gene indicated high  
541 diversity in both Th2R and Th3R, while the connecting region between Th2R and Th3R  
542 remained conserved.

543  
544  
545  
546  
547  
548  
549  
550  
551  
552  
553  
554  
555  
556  
557  
558

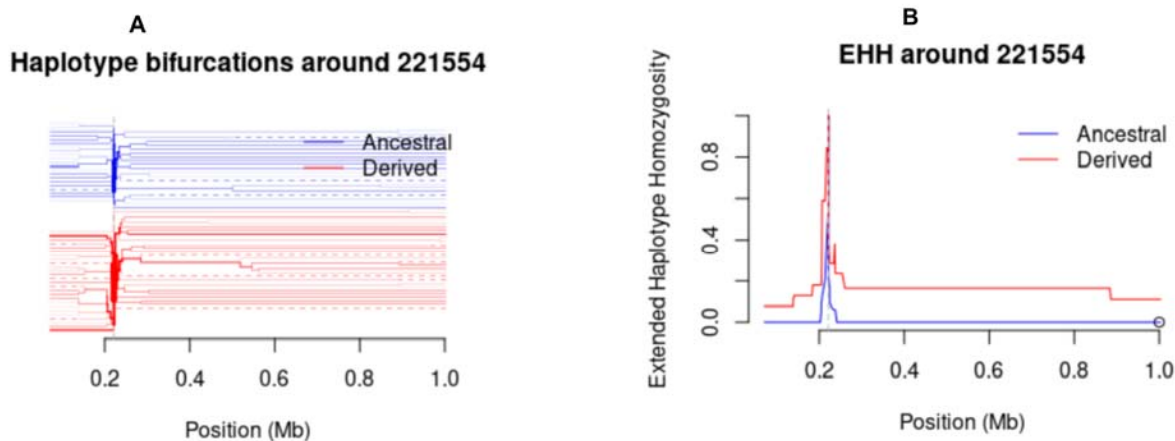

559  
560 **Figure 6:** Plots show Bifurcation diagram and Extended Haplotype Homozygosity  
561 (EHH). a) Bifurcation diagrams showing the breakdown of these extended haplotypes  
562 from increasing distances in the parasite population b) Plots of EHH showing extended  
563 haplotypes from a focal SNP locus (221,554). .

564  
565  
566  
567  
568  
569  
570  
571  
572  
573  
574  
575  
576  
577

578 Bibliography

- 579 1. WHO. World malaria report 2021. WHO; 2021.
- 580 2. WHO. World Malaria Report 2022. WHO [Internet]. 2022 [cited 2022 Dec 10]; Available  
581 from: <https://apps.who.int/iris/rest/bitstreams/1484818/retrieve>
- 582 3. Mitchell CL, Ngasala B, Janko MM, Chacky F, Edwards JK, Pence BW, et al. Evaluating  
583 malaria prevalence and land cover across varying transmission intensity in Tanzania  
584 using a cross-sectional survey of school-aged children. *Malar J*. 2022 Mar 9;21(1):80.
- 585 4. WHO. GLOBAL TECHNICAL STRATEGY FOR MALARIA. WHO. 2021;
- 586 5. Feachem RGA, Chen I, Akbari O, Bertozzi-Villa A, Bhatt S, Binka F, et al. Malaria  
587 eradication within a generation: ambitious, achievable, and necessary. *Lancet*. 2019 Sep  
588 21;394(10203):1056–112.
- 589 6. Dhiman S. Are malaria elimination efforts on right track? An analysis of gains achieved  
590 and challenges ahead. *Infect Dis Poverty*. 2019 Feb 13;8(1):14.
- 591 7. Guyant P, Corbel V, Guérin PJ, Lautissier A, Nosten F, Boyer S, et al. Past and new  
592 challenges for malaria control and elimination: the role of operational research for  
593 innovation in designing interventions. *Malar J*. 2015 Jul 17;14:279.
- 594 8. Huang H-Y, Liang X-Y, Lin L-Y, Chen J-T, Ehapo CS, Eyi UM, et al. Genetic  
595 polymorphism of *Plasmodium falciparum* circumsporozoite protein on Bioko Island,  
596 Equatorial Guinea and global comparative analysis. *Malar J*. 2020 Jul 13;19(1):245.
- 597 9. Casares S, Brumeanu T-D, Richie TL. The RTS,S malaria vaccine. *Vaccine*.  
598 2010;28(4880–94).
- 599 10. Koff WC, Gust ID, Plotkin SA. Toward a human vaccines project. *Nat Immunol*. 2014  
600 Jul;15(7):589–92.
- 601 11. Nadeem AY, Shehzad A, Islam SU, Al-Suhaimi EA, Lee YS. Mosquirix™ RTS, S/AS01  
602 vaccine development, immunogenicity, and efficacy. *Vaccines (Basel)*. 2022 Apr 30;10(5).
- 603 12. Duffy PE, Patrick Gorres J. Malaria vaccines since 2000: progress, priorities, products. *npj*  
604 *Vaccines*. 2020 Jun 9;5:48.
- 605 13. Le Roch KG, Chung DWD, Ponts N. Genomics and integrated systems biology in  
606 *Plasmodium falciparum*: a path to malaria control and eradication. *Parasite Immunol*.  
607 2012 Mar;34(2–3):50–60.
- 608 14. Mohamed NS, AbdElbagi H, Elsadig AR, Ahmed AE, Mohammed YO, Elssir LT, et al.  
609 Assessment of genetic diversity of *Plasmodium falciparum* circumsporozoite protein in  
610 Sudan: the RTS,S leading malaria vaccine candidate. *Malar J*. 2021 Nov 10;20(1):436.
- 611 15. Kurtovic L, Drew DR, Dent AE, Kazura JW, Beeson JG. Antibody Targets and Properties  
612 for Complement-Fixation Against the Circumsporozoite Protein in Malaria Immunity. *Front*  
613 *Immunol*. 2021 Dec 1;12:775659.
- 614 16. WHO. WHO Guidelines for malaria. WHO Geneva, Switzerland. 2022;

- 615 17. Stoute JA, Slaoui M, Heppner DG, Momin P, Kester KE, Desmons P, et al. A preliminary  
616 evaluation of a recombinant circumsporozoite protein vaccine against *Plasmodium*  
617 *falciparum* malaria. RTS,S Malaria Vaccine Evaluation Group. *N Engl J Med*. 1997 Jan  
618 9;336(2):86–91.
- 619 18. Regules JA, Cummings JF, Ockenhouse CF. The RTS,S vaccine candidate for malaria.  
620 *Expert Rev Vaccines*. 2011 May;10(5):589–99.
- 621 19. Asante KP, Abdulla S, Agnandji S, Lyimo J, Vekemans J, Soulanoudjingar S, et al. Safety  
622 and efficacy of the RTS,S/AS01E candidate malaria vaccine given with expanded-  
623 programme-on-immunisation vaccines: 19 month follow-up of a randomised, open-label,  
624 phase 2 trial. *Lancet Infect Dis*. 2011 Oct;11(10):741–9.
- 625 20. Bojang KA, Milligan PJ, Pinder M, Vigneron L, Allouche A, Kester KE, et al. Efficacy of  
626 RTS,S/AS02 malaria vaccine against *Plasmodium falciparum* infection in semi-immune  
627 adult men in The Gambia: a randomised trial. *Lancet*. 2001 Dec 8;358(9297):1927–34.
- 628 21. Aponte JJ, Aide P, Renom M, Mandomando I, Bassat Q, Sacarlal J, et al. Safety of the  
629 RTS,S/AS02D candidate malaria vaccine in infants living in a highly endemic area of  
630 Mozambique: a double blind randomised controlled phase I/IIb trial. *Lancet*. 2007 Nov  
631 3;370(9598):1543–51.
- 632 22. RTS,S Clinical Trials Partnership. Efficacy and safety of RTS,S/AS01 malaria vaccine with  
633 or without a booster dose in infants and children in Africa: final results of a phase 3,  
634 individually randomised, controlled trial. *Lancet*. 2015 Jul 4;386(9988):31–45.
- 635 23. Asante KP, Adjei G, Enuameh Y, Owusu-Agyei S. RTS,S malaria vaccine development:  
636 progress and considerations for postapproval introduction. *VDT*. 2016 Jun;25.
- 637 24. Collins KA, Snaith R, Cottingham MG, Gilbert SC, Hill AVS. Enhancing protective  
638 immunity to malaria with a highly immunogenic virus-like particle vaccine. *Sci Rep*. 2017  
639 Apr 19;7:46621.
- 640 25. Ballou WR, Rothbard J, Wirtz RA, Gordon DM, Williams JS, Gore RW, et al.  
641 Immunogenicity of synthetic peptides from circumsporozoite protein of *Plasmodium*  
642 *falciparum*. *Science*. 1985 May 24;228(4702):996–9.
- 643 26. Dattoo MS, Natama MH, Somé A, Traoré O, Rouamba T, Bellamy D, et al. Efficacy of a  
644 low-dose candidate malaria vaccine, R21 in adjuvant Matrix-M, with seasonal  
645 administration to children in Burkina Faso: a randomised controlled trial. *Lancet*. 2021  
646 May 15;397(10287):1809–18.
- 647 27. Dattoo MM, Dicko A, Tinto H, Ouédraogo J-B, Hamaluba M, Olotu A, et al. A Phase III  
648 Randomised Controlled Trial Evaluating the Malaria Vaccine Candidate R21/Matrix-M™ in  
649 African Children. 2023;
- 650 28. Neafsey DE, Juraska M, Bedford T, Benkeser D, Valim C, Griggs A, et al. Genetic  
651 diversity and protective efficacy of the RTS,S/AS01 malaria vaccine. *N Engl J Med*. 2015  
652 Nov 19;373(21):2025–37.
- 653 29. Chaudhury S, MacGill RS, Early AM, Bolton JS, King CR, Locke E, et al. Breadth of  
654 humoral immune responses to the C-terminus of the circumsporozoite protein is

- 655 associated with protective efficacy induced by the RTS,S malaria vaccine. *Vaccine*. 2021  
656 Feb 5;39(6):968–75.
- 657 30. Pinzon-Ortiz C, Friedman J, Esko J, Sinnis P. The binding of the circumsporozoite protein to  
658 cell surface heparan sulfate proteoglycans is required for plasmodium sporozoite  
659 attachment to target cells. *J Biol Chem*. 2001 Jul 20;276(29):26784–91.
- 660 31. Rathore D, Sacci JB, de la Vega P, McCutchan TF. Binding and invasion of liver cells by  
661 *Plasmodium falciparum* sporozoites. Essential involvement of the amino terminus of  
662 circumsporozoite protein. *J Biol Chem*. 2002 Mar 1;277(9):7092–8.
- 663 32. Gandhi K, Thera MA, Coulibaly D, Traoré K, Guindo AB, Ouattara A, et al. Variation in the  
664 circumsporozoite protein of *Plasmodium falciparum*: vaccine development implications.  
665 *PLoS ONE*. 2014 Jul 3;9(7):e101783.
- 666 33. Gandhi K, Thera MA, Coulibaly D, Traoré K, Guindo AB, Doumbo OK, et al. Next  
667 generation sequencing to detect variation in the *Plasmodium falciparum* circumsporozoite  
668 protein. *Am J Trop Med Hyg*. 2012 May;86(5):775–81.
- 669 34. Egan, JE, Hoffman SL, Gordon DM. Humoral immune responses in volunteers immunized  
670 with irradiated *Plasmodium falciparum* sporozoites. Cover The American Journal of  
671 Tropical Medicine and Hygiene The American Journal of Tropical Medicine and Hygiene.  
672 1993;
- 673 35. Plassmeyer ML, Reiter K, Shimp RL, Kotova S, Smith PD, Hurt DE, et al. Structure of the  
674 *Plasmodium falciparum* circumsporozoite protein, a leading malaria vaccine candidate. *J*  
675 *Biol Chem*. 2009 Sep 25;284(39):26951–63.
- 676 36. Barry AE, Schultz L, Buckee CO, Reeder JC. Contrasting population structures of the  
677 genes encoding ten leading vaccine-candidate antigens of the human malaria parasite,  
678 *Plasmodium falciparum*. *PLoS ONE*. 2009 Dec 30;4(12):e8497.
- 679 37. Zeeshan M, Alam MT, Vinayak S, Bora H, Tyagi RK, Alam MS, et al. Genetic variation in  
680 the *Plasmodium falciparum* circumsporozoite protein in India and its relevance to RTS,S  
681 malaria vaccine. *PLoS ONE*. 2012 Aug 17;7(8):e43430.
- 682 38. Lê HG, Kang J-M, Moe M, Jun H, Thái TL, Lee J, et al. Genetic polymorphism and natural  
683 selection of circumsporozoite surface protein in *Plasmodium falciparum* field isolates from  
684 Myanmar. *Malar J*. 2018 Oct 12;17(1):361.
- 685 39. Ishengoma D, Shayo A, Mandara C, Baraka V, Madebe R, Ngatunga, et al. The Role of  
686 Malaria Rapid Diagnostic Tests in Screening of Patients to be Enrolled in Clinical Trials in  
687 Low Malaria Transmission Settings. *iMedPub Journals*. 2016 Mar 16;
- 688 40. MalariaGEN, Ahouidi A, Ali M, Almagro-garcia J, Amambua-ngwa A, Amaratunga C, et al.  
689 An open dataset of *Plasmodium falciparum* genome variation in 7,000 worldwide samples.  
690 Wellcome Open Research. 2021;1–22.
- 691 41. Ghansah A, Amenga-Etego L, Amambua-Ngwa A, Andagalu B, Apinjoh T, Bouyou-Akotet  
692 M, et al. Monitoring parasite diversity for malaria elimination in sub-Saharan Africa.  
693 *Science*. 2014 Sep 12;345(6202):1297–8.



- 694 42. Shayo A, Mandara CI, Shahada F, Buza J, Lemnge MM, Ishengoma DS. Therapeutic  
695 efficacy and safety of artemether-lumefantrine for the treatment of uncomplicated  
696 falciparum malaria in North-Eastern Tanzania. *Malar J.* 2014 Sep 20;13:376.
- 697 43. Mandara CI, Kavishe RA, Gesase S, Mghamba J, Ngadaya E, Mmbuji P, et al. High  
698 efficacy of artemether-lumefantrine and dihydroartemisinin-piperaquine for the treatment  
699 of uncomplicated falciparum malaria in Muheza and Kigoma Districts, Tanzania. *Malar J.*  
700 2018 Jul 11;17(1):261.
- 701 44. Venkatesan M, Amaratunga C, Campino S, Auburn S, Koch O, Lim P, et al. Using CF11  
702 cellulose columns to inexpensively and effectively remove human DNA from *Plasmodium*  
703 falciparum-infected whole blood samples. *Malar J.* 2012 Feb 10;11:41.
- 704 45. MalariaGEN. Pf7: an open dataset of *Plasmodium falciparum* genome. Wellcome Open  
705 Research. 2023;8(22).
- 706 46. MalariaGEN, Ahouidi A, Ali M, Almagro-Garcia J, Amambua-Ngwa A, Amaratunga C, et  
707 al. An open dataset of *Plasmodium falciparum* genome variation in 7,000 worldwide  
708 samples. *Wellcome Open Res.* 2021 Jul 13;6:42.
- 709 47. Jung Y, Han D. BWA-MEME: BWA-MEM emulated with a machine learning approach.  
710 *BioRxiv.* 2021 Sep 1;
- 711 48. Purcell S, Neale B, Todd-Brown K, Thomas L, Ferreira MAR, Bender D, et al. PLINK: a  
712 tool set for whole-genome association and population-based linkage analyses. *Am J Hum*  
713 *Genet.* 2007 Sep;81(3):559–75.
- 714 49. McKenna A, Hanna M, Banks E, Sivachenko A, Cibulskis K, Kernytsky A, et al. The  
715 Genome Analysis Toolkit: a MapReduce framework for analyzing next-generation DNA  
716 sequencing data. *Genome Res.* 2010 Sep;20(9):1297–303.
- 717 50. Manske M, Miotto O, Campino S, Auburn S, Almagro-Garcia J, Maslen G, et al. Analysis  
718 of *Plasmodium falciparum* diversity in natural infections by deep sequencing. *Nature.*  
719 2012 Jul 19;487(7407):375–9.
- 720 51. Lee S, Harrison A, Tessier N, Tavul L, Miotto O. Assessing clonality in malaria parasites  
721 from massively parallel sequencing data. *F1000Research.* 2015;4(1043).
- 722 52. Chakraborty R, Danker-Hopfe H. Analysis of population structure: A comparative study of  
723 different estimators of wright's fixation indices. *Statistical methods in biological and*  
724 *medical sciences.* Elsevier; 1991. p. 203–54.
- 725 53. Rozas J, Ferrer-Mata A, Sánchez-DelBarrio JC, Guirao-Rico S, Librado P, Ramos-Onsins  
726 SE, et al. Dnasp 6: DNA sequence polymorphism analysis of large data sets. *Mol Biol*  
727 *Evol.* 2017 Dec 1;34(12):3299–302.
- 728 54. Bandelt HJ, Forster P, Röhl A. Median-joining networks for inferring intraspecific  
729 phylogenies. *Mol Biol Evol.* 1999 Jan;16(1):37–48.
- 730 55. Danecek P, Auton A, Abecasis G, Albers CA, Banks E, DePristo MA, et al. The variant  
731 call format and VCFtools. *Bioinformatics.* 2011 Aug 1;27(15):2156–8.
- 732 56. Tajima F. Statistical method for testing the neutral mutation hypothesis by DNA

- 733 polymorphism. *Genetics*. 1989 Nov;123(3):585–95.
- 734 57. Fu YX, Li WH. Statistical tests of neutrality of mutations. *Genetics*. 1993 Mar;133(3):693–  
735 709.
- 736 58. Tamura K, Stecher G, Kumar S. MEGA11: Molecular Evolutionary Genetics Analysis  
737 version 11. *Mol Biol Evol*. 2021 Jun 25;38(7):3022–7.
- 738 59. Thawer SG, Chacky F, Runge M, Reaves E, Mandike R, Lazaro S, et al. Sub-national  
739 stratification of malaria risk in mainland Tanzania: a simplified assembly of survey and  
740 routine data. *Malar J*. 2020 May 8;19(1):177.
- 741 60. MoHCDGEC. NATIONAL MALARIA STRATEGIC PLAN 2021-2025, TRANSITIONING  
742 TO MALARIA ELIMINATION IN PHASES. Ministry of Health, Community Development,  
743 Gender, Elderly and Childre. 2021;
- 744 61. WHO. WHO recommends R21/Matrix-M vaccine for malaria prevention in updated advice  
745 on immunization. WHO. 2023;
- 746 62. Aragam NR, Thayer KM, Nge N, Hoffman I, Martinson F, Kamwendo D, et al. Diversity of  
747 T cell epitopes in *Plasmodium falciparum* circumsporozoite protein likely due to protein-  
748 protein interactions. *PLoS ONE*. 2013 May 7;8(5):e62427.
- 749 63. Pringle JC, Wesolowski A, Berube S, Kobayashi T, Gebhardt ME, Mulenga M, et al. High  
750 *Plasmodium falciparum* genetic diversity and temporal stability despite control efforts in  
751 high transmission settings along the international border between Zambia and the  
752 Democratic Republic of the Congo. *Malar J*. 2019 Dec 4;18(1):400.
- 753 64. Amegashie EA, Amenga-Etego L, Adobor C, Ogoti P, Mbogo K, Amambua-Ngwa A, et al.  
754 Population genetic analysis of the *Plasmodium falciparum* circumsporozoite protein in two  
755 distinct ecological regions in Ghana. *Malar J*. 2020 Nov 27;19(1):437.
- 756 65. He Z-Q, Zhang Q-Q, Wang D, Hu Y-B, Zhou R-M, Qian D, et al. Genetic polymorphism of  
757 circumsporozoite protein of *Plasmodium falciparum* among Chinese migrant workers  
758 returning from Africa to Henan Province. *Malar J*. 2022 Aug 27;21(1):248.
- 759 66. Duffy CW, Ba H, Assefa S, Ahouidi AD, Deh YB, Tandia A, et al. Population genetic  
760 structure and adaptation of malaria parasites on the edge of endemic distribution. *Mol*  
761 *Ecol*. 2017 Jun;26(11):2880–94.
- 762 67. Amambua-Ngwa A, Tetteh KKA, Manske M, Gomez-Escobar N, Stewart LB, Deerhake  
763 ME, et al. Population genomic scan for candidate signatures of balancing selection to  
764 guide antigen characterization in malaria parasites. *PLoS Genet*. 2012 Nov  
765 1;8(11):e1002992.
- 766 68. Pringle JC, Carpi G, Almagro-Garcia J, Zhu SJ, Kobayashi T, Mulenga M, et al.  
767 RTS,S/AS01 malaria vaccine mismatch observed among *Plasmodium falciparum* isolates  
768 from southern and central Africa and globally. *Sci Rep*. 2018 Apr 26;8(1):6622.
- 769 69. Bailey JA, Mvalo T, Aragam N, Weiser M, Congdon S, Kamwendo D, et al. Use of  
770 massively parallel pyrosequencing to evaluate the diversity of and selection on  
771 *Plasmodium falciparum* csp T-cell epitopes in Lilongwe, Malawi. *J Infect Dis*. 2012 Aug



- 772 15;206(4):580–7.
- 773 70. Polley SD, Conway DJ. Strong diversifying selection on domains of the *Plasmodium*  
774 *falciparum* apical membrane antigen 1 gene. *Genetics*. 2001 Aug;158(4):1505–12.
- 775 71. Nirmolia T, Ahmed MA, Sathishkumar V, Sarma NP, Bhattacharyya DR, Mohapatra PK, et  
776 al. Genetic diversity of *Plasmodium falciparum* AMA-1 antigen from the Northeast Indian  
777 state of Tripura and comparison with global sequences: implications for vaccine  
778 development. *Malar J*. 2022 Feb 22;21(1):62.
- 779 72. Ajibola O, Diop MF, Ghansah A, Amenga-Etego L, Golassa L, Apinjoh T, et al. In silico  
780 characterisation of putative *Plasmodium falciparum* vaccine candidates in African malaria  
781 populations. *Sci Rep*. 2021 Aug 10;11(1):16215.
- 782 73. Chenet SM, Branch OH, Escalante AA, Lucas CM, Bacon DJ. Genetic diversity of vaccine  
783 candidate antigens in *Plasmodium falciparum* isolates from the Amazon basin of Peru.  
784 *Malar J*. 2008 May 27;7:93.
- 785 74. Reeder JC, Wapling J, Mueller I, Siba PM, Barry AE. Population genetic analysis of the  
786 *Plasmodium falciparum* 6-cys protein Pf38 in Papua New Guinea reveals domain-specific  
787 balancing selection. *Malar J*. 2011 May 14;10:126.
- 788 75. DHS. Malaria Indicator Survey 2017 [Internet]. 2018 [cited 2024 Jan 15]. Available from:  
789 <https://dhsprogram.com/pubs/pdf/MIS31/MIS31.pdf>
